# Supplementary material
Source: publisher site journal article supplement (https://www.dovepress.com/get_supplementary_file.php?f=311325.docx)
Supplement: Supplementary file 1 [file get_supplementary_file.php]

**Supplemental materials**

**Table S1.** Descriptive statistics of the responder’s dietary habits during the COVID-19 quarantine (“How many times a week do you consume the following foods?”) (Post-propensity match sample).

| Answer | N. of responders | Response* | LEPRE  (N=64) | PRESTO (N=128) | Combined (N=192) | P value |
| --- | --- | --- | --- | --- | --- | --- |
| Cereals and derivatives. e.g.: pasta, rice, bread, pizza, spelt, barley, etc. | 173 | - | 7.00 (6-7) | 7.00 (3-7.75) | 7.00 (4-7) | 0.103 |
| Cereal products. e.g.: corn flakes, cookies, rusks, crackers, etc. | 173 | - | 7.00 (5-7) | 7.00 (2.25-7) | 7.00 (3-7) | 0.184 |
| Fresh meat. | 172 | - | 3 (2-5) | 3 (2-4) | 3 (2-4) | 0.282 |
| Processed meats. e.g.: ham, salami, sausages, etc. | 172 | - | 2 (1-3.5) | 1 (1-3) | 2 (1-3) | 0.104 |
| Fish and other fishery products. e.g.: sea bass, octopus, prawns, etc. | 172 | - | 2 (1-2) | 2 (1-3) | 2 (1-3) | 0.865 |
| Milk and yogurt. | 172 | - | 7 (2-7) | 7 (1-7) | 7 (1-7) | 0.77 |
| Dairy products. e.g.: fresh and aged cheeses. | 172 | - | 3 (2-5) | 3 (1-5) | 3 (1-5) | 0.451 |
| Fresh fruit. | 172 | - | 6 (4-7) | 7 (5-10) | 7 (4-10) | 0.202 |
| Dried fruit. e.g.: walnuts, hazelnuts, almonds, etc. | 172 | - | 1 (0-4) | 2 (0-5) | 2 (0-5) | 0.256 |
| Vegetables or greens. e.g.: lettuce, radicchio, endive, spinach, chard, etc. | 172 | - | 7 (6-14) | 9 (7-14) | 7 (6-14) | 0.32 |
| Legumes. e.g.: beans, lentils, peas, chickpeas, etc. | 172 | - | 2 (1-3) | 2 (1-4) | 2 (1-4) | 0.051 |
| Eggs. | **172** | **-** | **1 (1-2)** | **2 (1-2)** | **2 (1-2)** | **0.005** |
| Desserts. e.g.: cakes, ice cream, chocolate, etc. | 172 | - | 3 (2-6.5) | 4 (2-7) | 4 (2-7) | 0.884 |
| Carbonated drinks. e.g.: coca cola, orange soda, etc. | 172 | - | 0 (0-2) | 0 (0-1) | 0 (0-1.25) | 0.428 |
| Alcoholic beverages. e.g.: wine, beer, spirits, etc. | 172 | - | 1 (0-3) | 1 (0-3) | 1 (0-3) | 0.606 |
| Cereals and derivatives. e.g.: pasta, rice, bread, pizza, spelt, barley, etc. | 173 | Normal | 0% ( 0) | 1% ( 1) | 1% ( 1) | 0.471 |
| Below threshold | 100% ( 59) | 99% (113) | 99% (172) |
| Fresh meat. | 172 | Normal | 71% ( 42) | 60% ( 68) | 64% (110) | 0.153 |
| Below threshold | 29% ( 17) | 40% ( 45) | 36% ( 62) |
| Processed meats. e.g.: ham, salami, wurstel, etc. | 172 | Normal | 86% ( 51) | 82% ( 93) | 84% (144) | 0.485 |
| Below threshold | 14% ( 8) | 18% ( 20) | 16% ( 28) |
| Fish and other fishery products. e.g.: sea bass, octopus, prawns, etc. | 172 | Normal | 12% ( 7) | 19% ( 22) | 17% ( 29) | 0.206 |
| Below threshold | 88% ( 52) | 81% ( 91) | 83% (143) |
| Milk and yogurt. | 172 | Normal | 0% ( 0) | 0% ( 0) | 0% ( 0) | 1.0 |
| Below threshold | 100% ( 59) | 100% (113) | 100% (172) |
| Dairy products. e.g.: fresh and aged cheeses. | 172 | Normal | 61% (36) | 54% (61) | 56% (97) | 0.377 |
| Below threshold | 39% (23) | 46% (52) | 44% (75) |
| Dried fruit. e.g.: walnuts, hazelnuts, almonds, etc. | 172 | Normal | 31% ( 18) | 42% ( 47) | 38% ( 65) | 0.155 |
| Below threshold | 69% ( 41) | 58% ( 66) | 62% (107) |
| Vegetables or greens. e.g.: lettuce, radicchio, endive, spinach, chard, etc. | 172 | Normal | 2% ( 1) | 1% ( 1) | 1% ( 2) | 0.638 |
| Below threshold | 98% ( 58) | 99% (112) | 99% (170) |
| Legumes. e.g.: beans, lentils, peas, chickpeas, etc. | 172 | Normal | 41% (24) | 47% (53) | 45% (77) | 0.436 |
| Below threshold | 59% (35) | 53% (60) | 55% (95) |
| Eggs. | **172** | **Normal** | **41% (24)** | **60% (68)** | **53% (92)** | **0.015** |
| **Below threshold** | **59% (35)** | **40% (45)** | **47% (80)** |
| Carbonated drinks. e.g.: coca cola, orange soda, etc. | 172 | Normal | 3% ( 2) | 6% ( 7) | 5% ( 9) | 0.433 |
| Below threshold | 97% ( 57) | 94% (106) | 95% (163) |
| Alcoholic beverages. e.g.:wine, beer, spirits, etc. | 172 | Normal | 58% ( 34) | 60% ( 68) | 59% (102) | 0.747 |
| Below threshold | 42% (25) | 44% (44) | 44% (69) |

**Legend**: significant P values between LEPRE and PRESTO groups are expressed in bold characters. Answers are reported as median of the week (I-III interquartile range) and as qualitative categorical variable.

**Sub analyses**

1. **LEPRE vs PRESTO (only people with chronic diseases)**

**Table S2**. Descriptive statistics of the survey responders (only people declaring chronic diseases).

| Answer | N. of responders | Variable | LEPRE  (N=64) | PRESTO  (N=179) | Combined  (N=243) | P value |
| --- | --- | --- | --- | --- | --- | --- |
| How old are you? | **243** | **Age, median (I-III quartile range)** | **43 (35-54.5)** | **59 (45-65.5)** | **55 (42-63)** | **<0.001** |
| Age class | **243** | **<=29** | **16% ( 10)** | **6% ( 11)** | **9% ( 21)** | **<0.001** |
| **29-65** | **81% ( 52)** | **69% (123)** | **72% (175)** |
| **65+** | **3% ( 2)** | **25% ( 45)** | **19% ( 47)** |
| What is your gender | **243** | **Female** | **88% ( 56)** | **58% (104)** | **66% (160)** | **<0.001** |
| **Male** | **12% ( 8)** | **42% ( 75)** | **34% ( 83)** |
| Please specify your nationality | 243 | Other | 3% ( 2) | 3% ( 5) | 3% ( 7) | 0.892 |
| Italian | 97% ( 62) | 97% (174) | 97% (236) |
| What is your level of education? | **243** | **High School** | **70% ( 45)** | **53% ( 95)** | **58% (140)** | **0.01** |
| **University** | **28% ( 18)** | **47% ( 84)** | **42% (102)** |
| **Secondary school** | **2% ( 1)** | **0% ( 0)** | **0% ( 1)** |
| What is your employment status? | 243 | Employed | 97% ( 62) | 98% (176) | 98% (238) | 0.483 |
| Student | 3% ( 2) | 2% ( 3) | 2% ( 5) |
| What is your house like? | **243** | **Flat** | **39% ( 25)** | **72% (128)** | **63% (153)** | **<0.001** |
| **Studio flat** | **2% ( 1)** | **2% ( 4)** | **2% ( 5)** |
| **Detached house** | **59% ( 38)** | **26% ( 47)** | **35% ( 85)** |
| Can you access a private garden? | **243** | **No** | **19% ( 12)** | **47% ( 85)** | **40% ( 97)** | **<0.001** |
| **Yes** | **81% ( 52)** | **53% ( 94)** | **60% (146)** |
| Did you take the swab test? | **168** | **No** | **81% ( 51)** | **95% (100)** | **90% (151)** | **0.003** |
| **Yes** | **19% ( 12)** | **5% ( 5)** | **10% ( 17)** |
| Have you lost anyone during this period? | 166 | No | 89% ( 56) | 86% ( 89) | 87% (145) | 0.641 |
| Yes | 11% ( 7) | 14% ( 14) | 13% ( 21) |
| Besides yourself, how many people live in your home? | **239** | **I do not live alone** | **94% (59)** | **82% (144)** | **85% (203)** | **0.024** |
| **I live alone** | **6% ( 4)** | **18% ( 32)** | **15% ( 36)** |
| AFTER the measures taken by the government to contain the spread of the coronavirus since you have been in quarantine do you habitually practice some physical activity | 195 | No | 73% ( 43) | 60% ( 81) | 64% (124) | 0.076 |
| Yes | 27% ( 16) | 40% ( 55) | 36% ( 71) |
| Own a pet | **243** | **No** | **33% ( 21)** | **54% ( 97)** | **49% (118)** | **0.003** |
| **Yes** | **67% ( 43)** | **46% ( 82)** | **51% (125)** |
| Mental health scores |  |  |  |  |  |  |
| GHQ 12 Total score | 213 | 0-13 | 15% ( 9) | 14% ( 22) | 15% ( 31) | 0.958 |
| 14-36 | 85% ( 52) | 86% (130) | 85% (182) |
| IES R Total score | 207 | 0-23 | 43% ( 26) | 59% ( 87) | 55% (113) | 0.208 |
| 24-32 | 27% ( 16) | 19% ( 28) | 21% ( 44) |
| 33-36 | 7% ( 4) | 6% ( 9) | 6% ( 13) |
| 37-88 | 23% ( 14) | 16% ( 23) | 18% ( 37) |
| CESD Total score | 202 | 0-15 | 55% ( 33) | 58% ( 83) | 57% (116) | 0.818 |
| 16-23 | 27% ( 16) | 23% ( 32) | 24% ( 48) |
| 24-60 | 18% ( 11) | 19% ( 27) | 19% ( 38) |

**Legend**: significant P values between LEPRE and PRESTO groups are expressed in bold characters.

**Table S3**. Descriptive statistics of the survey responders post propensity score matching (only people declaring chronic diseases).

| Answer | N. of responders | Variable | LEPRE  (N=64) | PRESTO (N=128) | Combined (N=192) | P value |
| --- | --- | --- | --- | --- | --- | --- |
| How old are you? | **192** | Age, median (I-III quartile range) | **43 (35-54.5)** | **53 (41-61)** | **49 (39-60)** | **0.005** |
| Age class | 192 | <=29 | 16% ( 10) | 9% ( 11) | 11% ( 21) | 0.246 |
| 29-65 | 81% ( 52) | 85% (109) | 84% (161) |
| 65+ | 3% ( 2) | 6% ( 8) | 5% ( 10) |
| What is your gender | **192** | Female | **88% ( 56)** | **70% ( 90)** | **76% (146)** | **0.009** |
| Male | **12% ( 8)** | **30% ( 38)** | **24% ( 46)** |
| Please specify your nationality | 192 | Other | 3% ( 2) | 4% ( 5) | 4% ( 7) | 0.785 |
| Italian | 97% ( 62) | 96% (123) | 96% (185) |
| What is your level of education? | 192 | High School | 70% ( 45) | 63% ( 81) | 66% (126) | 0.197 |
| University | 28% ( 18) | 37% ( 47) | 34% ( 65) |
| Secondary school | 2% ( 1) | 0% ( 0) | 1% ( 1) |
| What is your employment status? | 192 | Employed | 97% ( 62) | 98% (125) | 97% (187) | 0.749 |
| Student | 3% ( 2) | 2% ( 3) | 3% ( 5) |
| What is your house like? | **192** | Flat | **39% ( 25)** | **66% ( 85)** | **57% (110)** | **0.001** |
| Studio flat | **2% ( 1)** | **3% ( 4)** | **3% ( 5)** |
| Detached house | **59% ( 38)** | **30% ( 39)** | **40% ( 77)** |
| Can you access a private garden? | **192** | No | **19% ( 12)** | **44% ( 56)** | **35% ( 68)** | **0.001** |
| Yes | **81% ( 52)** | **56% ( 72)** | **65% (124)** |
| Did you take the swab test? | **135** | No | **81% ( 51)** | **93% ( 67)** | **87% (118)** | **0.034** |
| Yes | **19% ( 12)** | **7% ( 5)** | **13% ( 17)** |
| Have you lost anyone during this period? | 134 | No | 89% ( 56) | 85% ( 60) | 87% (116) | 0.458 |
| Yes | 11% ( 7) | 15% ( 11) | 13% ( 18) |
| Besides yourself, how many people live in your home? | 189 | I do not live alone | 94% ( 59) | 85% (107) | 88% (166) | 0.084 |
| I live alone | 6% ( 4) | 15% ( 19) | 12% ( 23) |
| Own a pet | 192 | No | 33% ( 21) | 45% ( 58) | 41% ( 79) | 0.097 |
| Yes | 67% ( 43) | 55% ( 70) | 59% (113) |
| Mental health scores |  |  |  |  |  |  |
| GHQ 12 Total score | 176 | 0-13 | 15% ( 9) | 17% ( 20) | 16% ( 29) | 0.654 |
| 14-36 | 85% ( 52) | 83% ( 95) | 84% (147) |
| IES R Total score | 171 | 0-23 | 43% (26) | 54% (60) | 50% (86) | 0.552 |
| 24-32 | 27% (16) | 20% (22) | 22% (38) |
| 33-36 | 7% ( 4) | 7% ( 8) | 7% (12) |
| 37-88 | 23% (14) | 19% (21) | 20% (35) |
| CESD Total score | 167 | 0-15 | 55% (33) | 55% (59) | 55% (92) | 0.742 |
| 16-23 | 27% (16) | 22% (24) | 24% (40) |
| 24-60 | 18% (11) | 22% (24) | 21% (35) |

**Legend**: significant P values between LEPRE and PRESTO groups are expressed in bold characters.

**Table S4**. Descriptive statistics of the missing activities “Which of the following activities are you missing the most during this quarantine period?” (only people declaring chronic diseases) during the COVID-19 quarantine (Post-propensity match sample).

| Answer | N. of responders | Variable | LEPRE (N=64) | PRESTO (N=128) | Combined (N=192) | P value |
| --- | --- | --- | --- | --- | --- | --- |
| Going to the cinema, theater. | 191 | Not selected | 75% ( 47) | 81% (104) | 79% (151) | 0.288 |
| Yes | 25% ( 16) | 19% ( 24) | 21% ( 40) |
| Playing sports/exercise. | **191** | **Not selected** | **81% ( 51)** | **64% ( 82)** | **70% (133)** | **0.017** |
| **Yes** | **19% ( 12)** | **36% ( 46)** | **30% ( 58)** |
| Going to exhibitions and museums. | 191 | Not selected | 89% ( 56) | 81% (104) | 84% (160) | 0.178 |
| Yes | 11% ( 7) | 19% ( 24) | 16% ( 31) |
| Going to nightclubs. | 191 | Not selected | 98% ( 62) | 98% (126) | 98% (188) | 0.99 |
| Yes | 2% ( 1) | 2% ( 2) | 2% ( 3) |
| Attending sporting events. | 191 | Not selected | 95% ( 60) | 95% (122) | 95% (182) | 0.982 |
| Yes | 5% ( 3) | 5% ( 6) | 5% ( 9) |
| Going out to eat. | 191 | Not selected | 56% ( 35) | 58% ( 74) | 57% (109) | 0.767 |
| Yes | 44% ( 28) | 42% ( 54) | 43% ( 82) |
| Going to coffee shops. | 191 | Not selected | 84% ( 53) | 85% (109) | 85% (162) | 0.852 |
| Yes | 16% ( 10) | 15% ( 19) | 15% ( 29) |
| Gardening. | 191 | Not selected | 95% ( 60) | 91% (116) | 92% (176) | 0.265 |
| Yes | 5% ( 3) | 9% ( 12) | 8% ( 15) |
| Going out for a walk. | 191 | Not selected | 40% ( 25) | 38% ( 48) | 38% ( 73) | 0.77 |
| Yes | 60% ( 38) | 62% ( 80) | 62% (118) |
| Going out with friends. | 191 | Not selected | 40% ( 25) | 48% ( 61) | 45% ( 86) | 0.298 |
| Yes | 60% ( 38) | 52% ( 67) | 55% (105) |
| See the family. | **191** | **Not selected** | **29% (18)** | **62% (80)** | **51% (98)** | **<1e-04** |
| **Yes** | **71% (45)** | **38% (48)** | **49% (93)** |
| Going shopping. | 191 | Not selected | 78% ( 49) | 77% ( 99) | 77% (148) | 0.946 |
| Yes | 22% ( 14) | 23% ( 29) | 23% ( 43) |
| Going to work. | 191 | Not selected | 75% ( 47) | 75% ( 96) | 75% (143) | 0.953 |
| Yes | 25% ( 16) | 25% ( 32) | 25% ( 48) |

**Legend**: significant P values between LEPRE and PRESTO groups are expressed in bold characters.

1. **LEPRE vs PRESTO (by excluding patients with chronic diseases)**

**Table S5**. Descriptive statistics of the survey responders (by excluding patients with chronic diseases).

| Answer | N. of responders | Variable | Lepre (N=64) | Presto Insieme (N=935) | Combined (N=999) | P value |
| --- | --- | --- | --- | --- | --- | --- |
| How old are you? | 999 | Age, median (I-III quartile range) | 43 (35-54.5) | 45 (32-54) | 45 (33-54.0) | 0.65 |
| Age class | 999 | <29 | 16% ( 10) | 21% (196) | 21% (206) | 0.196 |
| 29-65 | 81% ( 52) | 71% (668) | 72% (720) |
| 65+ | 3% ( 2) | 8% ( 71) | 7% ( 73) |
| What is your gender | **997** | Female | **88% ( 56)** | **61% (569)** | **63% (625)** | **<0.001** |
| Male | **12% ( 8)** | **39% (364)** | **37% (372)** |
| Please specify your nationality | 999 | Other | 3% ( 2) | 2% ( 15) | 2% ( 17) | 0.363 |
| Italian | 97% ( 62) | 98% (920) | 98% (982) |
| What is your level of education? | **999** | **High School** | **70% ( 45)** | **50% (468)** | **51% (513)** | **0.002** |
| **University** | **28% ( 18)** | **50% (464)** | **48% (482)** |
| **Secondary school** | **2% ( 1)** | **0% ( 3)** | **0% ( 4)** |
| What is your employment status? | 999 | Employed | 97% ( 62) | 91% (853) | 92% (915) | 0.115 |
| Student | 3% ( 2) | 9% ( 82) | 8% ( 84) |
| What is your house like? | **999** | **Flat** | **39% ( 25)** | **65% (612)** | **64% (637)** | **<0.001** |
| **Studio flat** | **2% ( 1)** | **2% ( 22)** | **2% ( 23)** |
| **Detached house** | **59% ( 38)** | **32% (301)** | **34% (339)** |
| Can you access a private garden? | **997** | **No** | **19% ( 12)** | **43% (402)** | **42% (414)** | **<0.001** |
| **Yes** | **81% ( 52)** | **57% (531)** | **58% (583)** |
| Did you take the swab test? | **528** | **No** | **81% ( 51)** | **96% (448)** | **95% (499)** | **<0.001** |
| **Yes** | **19% ( 12)** | **4% ( 17)** | **5% ( 29)** |
| Have you lost anyone during this period? | 526 | No | 89% ( 56) | 91% (420) | 90% (476) | 0.643 |
| Yes | 11% ( 7) | 9% ( 43) | 10% ( 50) |
| Besides yourself, how many people live in your home? | 977 | I do not live alone | 94% ( 59) | 85% (780) | 86% (839) | 0.067 |
| I live alone | 6% ( 4) | 15% (134) | 14% (138) |
| AFTER the measures taken by the government to contain the spread of the coronavirus since you have been in quarantine do you habitually practice some physical activity | **831** | **No** | **73% ( 43)** | **56% (435)** | **58% (478)** | **0.013** |
| **Yes** | **27% ( 16)** | **44% (337)** | **42% (353)** |
| Own a pet | **999** | **No** | **33% ( 21)** | **54% (509)** | **53% (530)** | **0.001** |
| **Yes** | **67% ( 43)** | **46% (426)** | **47% (469)** |
| Mental health scores |  |  |  |  |  |  |
| GHQ 12 Total score | 906 | 0-13 | 15% ( 9) | 12% (101) | 12% (110) | 0.518 |
| 14-36 | 85% ( 52) | 88% (744) | 88% (796) |
| IES R Total score | **885** | **0-23** | **43% ( 26)** | **63% (520)** | **62% (546)** | **0.024** |
| **24-32** | **27% ( 16)** | **18% (149)** | **19% (165)** |
| **33-36** | **7% ( 4)** | **5% ( 41)** | **5% ( 45)** |
| **37-88** | **23% ( 14)** | **14% (115)** | **15% (129)** |
| CESD Total score | 865 | 0-15 | 55% ( 33) | 63% (507) | 62% (540) | 0.446 |
| 16-23 | 27% ( 16) | 21% (168) | 21% (184) |
| 24-60 | 18% ( 11) | 16% (130) | 16% (141) |

**Legend**: significant P values between LEPRE and PRESTO groups are expressed in bold characters.

**Table S6**. Descriptive statistics of the survey responders post propensity score matching (by excluding patients with chronic diseases).

| Answer | N. of responders | Variable | Lepre (N=64) | Presto Insieme (N=128) | Combined (N=192) | P value |
| --- | --- | --- | --- | --- | --- | --- |
| How old are you? | 192 | Age, median (I-III quartile range) | 43 (35-54.5) | 47 (37.8-54) | 46 (37-54) | 0.51 |
| Age class | 192 | <29 | 16% ( 10) | 8% ( 10) | 10% ( 20) | 0.227 |
| 29-65 | 81% ( 52) | 90% (115) | 87% (167) |
| 65+ | 3% ( 2) | 2% ( 3) | 3% ( 5) |
| What is your gender | 191 | Female | 88% ( 56) | 85% (108) | 86% (164) | 0.645 |
| Male | 12% ( 8) | 15% ( 19) | 14% ( 27) |
| Please specify your nationality | 192 | Other | 3% ( 2) | 1% ( 1) | 2% ( 3) | 0.217 |
| Italian | 97% ( 62) | 99% (127) | 98% (189) |
| What is your level of education? | 192 | High School | 70% ( 45) | 70% ( 89) | 70% (134) | 0.994 |
| University | 28% ( 18) | 29% ( 37) | 29% ( 55) |
| Secondary school | 2% ( 1) | 2% ( 2) | 2% ( 3) |
| What is your employment status? | 192 | Employed | 97% ( 62) | 98% (125) | 97% (187) | 0.749 |
| Student | 3% ( 2) | 2% ( 3) | 3% ( 5) |
| What is your house like? | 192 | Flat | 39% ( 25) | 38% ( 49) | 39% ( 74) | 0.872 |
| Studio flat | 2% ( 1) | 1% ( 1) | 1% ( 2) |
| Detached house | 59% ( 38) | 61% ( 78) | 60% (116) |
| Can you access a private garden? | 192 | No | 19% ( 12) | 20% ( 26) | 20% ( 38) | 0.798 |
| Yes | 81% ( 52) | 80% (102) | 80% (154) |
| Did you take the swab test? | **125** | **No** | **81% ( 51)** | **95% ( 59)** | **88% (110)** | **0.015** |
| **Yes** | **19% ( 12)** | **5% ( 3)** | **12% ( 15)** |
| Have you lost anyone during this period? | 125 | No | 89% ( 56) | 97% ( 60) | 93% (116) | 0.088 |
| Yes | 11% ( 7) | 3% ( 2) | 7% ( 9) |
| Besides yourself, how many people live in your home? | 186 | I do not live alone | 94% ( 59) | 95% (117) | 95% (176) | 0.674 |
| I live alone | 6% ( 4) | 5% ( 6) | 5% ( 10) |
| AFTER the measures taken by the government to contain the spread of the coronavirus since you have been in quarantine do you habitually practice some physical activity | 166 | No | 73% ( 43) | 72% ( 77) | 72% (120) | 0.899 |
| Yes | 27% ( 16) | 28% ( 30) | 28% ( 46) |
| Own a pet | 192 | No | 33% ( 21) | 34% ( 43) | 33% ( 64) | 0.914 |
| Yes | 67% ( 43) | 66% ( 85) | 67% (128) |
| Mental health score |  |  |  |  |  |  |
| GHQ 12 Total score | 175 | 0-13 | 15% ( 9) | 16% ( 18) | 15% ( 27) | 0.857 |
| 14-36 | 85% ( 52) | 84% ( 96) | 85% (148) |
| IES R Total score | 171 | 0-23 | 43% (26) | 55% (61) | 51% (87) | 0.376 |
| 24-32 | 27% (16) | 17% (19) | 20% (35) |
| 33-36 | 7% ( 4) | 8% ( 9) | 8% (13) |
| 37-88 | 23% (14) | 20% (22) | 21% (36) |
| CESD Total score | 168 | 0-15 | 55% ( 33) | 67% ( 72) | 62% (105) | 0.284 |
| 16-23 | 27% ( 16) | 18% ( 19) | 21% ( 35) |
| 24-60 | 18% ( 11) | 16% ( 17) | 17% ( 28) |

**Legend**: significant P values between LEPRE and PRESTO groups are expressed in bold characters.

**Table S7**. Descriptive statistics of the missing activities (*“Which of the following activities are you missing the most during this quarantine period?”*). (Post-propensity match sample by excluding patients with chronic diseases).

| Answer | N. of responders | Response | Lepre (N=64) | Presto Insieme (N=128) | Combined (N=192) | P value |
| --- | --- | --- | --- | --- | --- | --- |
| Going to the cinema, theater. | 191 | Not selected | 75% ( 47) | 77% ( 99) | 76% (146) | 0.675 |
| Yes | 25% ( 16) | 23% ( 29) | 24% ( 45) |
| Playing sports/exercise. | **191** | **Not selected** | **81% ( 51)** | **62% ( 79)** | **68% (130)** | **0.007** |
| **Yes** | **19% ( 12)** | **38% ( 49)** | **32% ( 61)** |
| Going to exhibitions and museums. | 191 | Not selected | 89% ( 56) | 88% (113) | 88% (169) | 0.902 |
| Yes | 11% ( 7) | 12% ( 15) | 12% ( 22) |
| Going to nightclubs. | 191 | Not selected | 98% ( 62) | 98% (126) | 98% (188) | 0.99 |
| Yes | 2% ( 1) | 2% ( 2) | 2% ( 3) |
| Attending sporting events. | 191 | Not selected | 95% ( 60) | 89% (114) | 91% (174) | 0.159 |
| Yes | 5% ( 3) | 11% ( 14) | 9% ( 17) |
| Going out to eat. | 191 | Not selected | 56% (35) | 46% (59) | 49% (94) | 0.219 |
| Yes | 44% (28) | 54% (69) | 51% (97) |
| Going to coffee shops. | 191 | Not selected | 84% ( 53) | 87% (111) | 86% (164) | 0.629 |
| Yes | 16% ( 10) | 13% ( 17) | 14% ( 27) |
| Gardening. | 191 | Not selected | 95% ( 60) | 98% (125) | 97% (185) | 0.368 |
| Yes | 5% ( 3) | 2% ( 3) | 3% ( 6) |
| Going out for a walk. | 191 | Not selected | 40% ( 25) | 34% ( 43) | 36% ( 68) | 0.409 |
| Yes | 60% ( 38) | 66% ( 85) | 64% (123) |
| Going out with friends. | 191 | Not selected | 40% ( 25) | 39% ( 50) | 39% ( 75) | 0.934 |
| Yes | 60% ( 38) | 61% ( 78) | 61% (116) |
| See the family. | **191** | **Not selected** | **29% ( 18)** | **70% ( 89)** | **56% (107)** | **<0.01** |
| **Yes** | **71% ( 45)** | **30% ( 39)** | **44% ( 84)** |
| Going shopping. | 191 | Not selected | 78% ( 49) | 78% (100) | 78% (149) | 0.957 |
| Yes | 22% ( 14) | 22% ( 28) | 22% ( 42) |
| Going to work. | 191 | Not selected | 75% ( 47) | 66% ( 84) | 69% (131) | 0.209 |
| Yes | 25% ( 16) | 34% ( 44) | 31% ( 60) |

**Legend**: significant P values between LEPRE and PRESTO groups are expressed in bold characters.

**Cluster analysis**

**Table S8.** Descriptive statistics of the Clusters identified on the propensity score matched sample.

| Answer | N. of responders | Variable | CLUSTER 1 (N=152) | CLUSTER 2 (N=40) | Combined (N=192) | P value |
| --- | --- | --- | --- | --- | --- | --- |
|  | 192 | **Source: LEPRE** | 32% ( 49) | 38% ( 15) | 33% ( 64) | 0.53 |
| **Source: PRESTO** | 68% (103) | 62% ( 25) | 67% (128) |
| How old are you? | 192 | **Age (median, I-III quartile range)** | 38/46/56  46 (38-56) | 38/44/51 | 38/46/55 | 0.19 |
| What is your gender | **192** | Female | **83% (126)** | **98% ( 39)** | **86% (165)** | **0.018** |
| Male | **17% ( 26)** | **2% ( 1)** | **14% ( 27)** |
| Please specify your nationality | 192 | Other | 3% ( 4) | 0% ( 0) | 2% ( 4) | 0.3 |
| Italian | 97% (148) | 100% ( 40) | 98% (188) |
| What is your level of education? | 192 | High School | 68% (104) | 57% ( 23) | 66% (127) | 0.22 |
| University | 30% ( 45) | 42% ( 17) | 32% ( 62) |
| Secondary school | 2% ( 3) | 0% ( 0) | 2% ( 3) |
| What is your employment status? Employed | 192 |  | 97% (148) | 95% ( 38) | 97% (186) | 0.44 |
| Student | 3% ( 4) | 5% ( 2) | 3% ( 6) |
| What is your house like? | 192 | Flat | 38% ( 57) | 42% ( 17) | 39% ( 74) | 0.48 |
| Studio flat | 1% ( 1) | 2% ( 1) | 1% ( 2) |
| Detached house | 62% ( 94) | 55% ( 22) | 60% (116) |
| Can you access a private garden? | 192 | No | 18% ( 27) | 22% ( 9) | 19% ( 36) | 0.49 |
| Yes | 82% (125) | 78% ( 31) | 81% (156) |
| Did you take the swab test? | 126 | No | 84% ( 81) | 80% ( 24) | 83% (105) | 0.57 |
| Yes | 16% ( 15) | 20% ( 6) | 17% ( 21) |
| Have you lost anyone during this period? | 125 | No | 94% ( 89) | 83% ( 25) | 91% (114) | 0.081 |
| Yes | 6% ( 6) | 17% ( 5) | 9% ( 11) |
| Besides yourself, how many people live in your home? | 188 | I do not live alone | 93% (138) | 98% ( 39) | 94% (177) | 0.31 |
| I live alone | 7% ( 10) | 2% ( 1) | 6% ( 11) |
| Own a pet | 192 | No | 28% ( 43) | 42% ( 17) | 31% ( 60) | 0.084 |
| Yes | 72% (109) | 57% ( 23) | 69% (132) |
| Mental health scores |  |  |  |  |  |  |
| GHQ 12 Total score | **181** | 0-13 | **16% ( 23)** | **0% ( 0)** | **13% ( 23)** | **0.006** |
| 14-36 | **84% (118)** | **100% ( 40)** | **87% (158)** |
| IES R Total score | **178** | 0-23 | **59% (81)** | **12% ( 5)** | **48% (86)** | **<0.001** |
| 24-32 | **30% (41)** | **5% ( 2)** | **24% (43)** |
| 33-36 | **6% ( 8)** | **8% ( 3)** | **6% (11)** |
| 37-88 | **6% ( 8)** | **75% (30)** | **21% (38)** |
| CESD Total score | **176** | 0-15 | **75% (102)** | **2% ( 1)** | **59% (103)** | **<0.001** |
| 16-23 | **24% ( 32)** | **22% ( 9)** | **23% ( 41)** |
| 24-60 | **1% ( 2)** | **75% ( 30)** | **18% ( 32)** |

**Legend**: significant P values between LEPRE and PRESTO groups are expressed in bold characters.

**Figures**


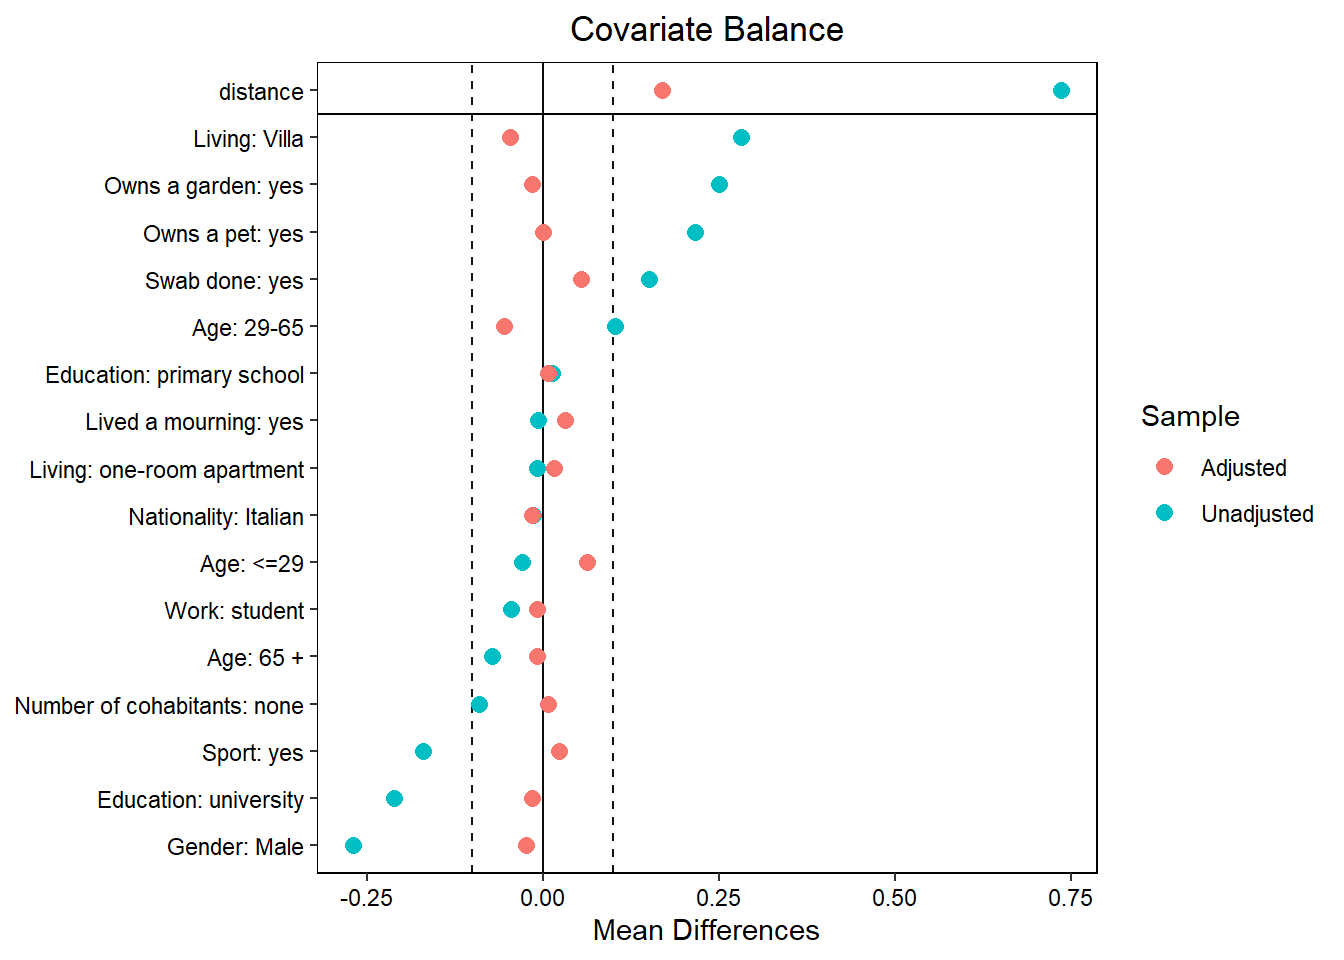


**Figure S1.** Mean difference in responders’ characteristics across study groups. The blue points represent the unadjusted differences; the red ones are the propensity adjusted difference. The +/-0.1 threshold indicating an acceptable balance has been reported.

| PANEL (A)  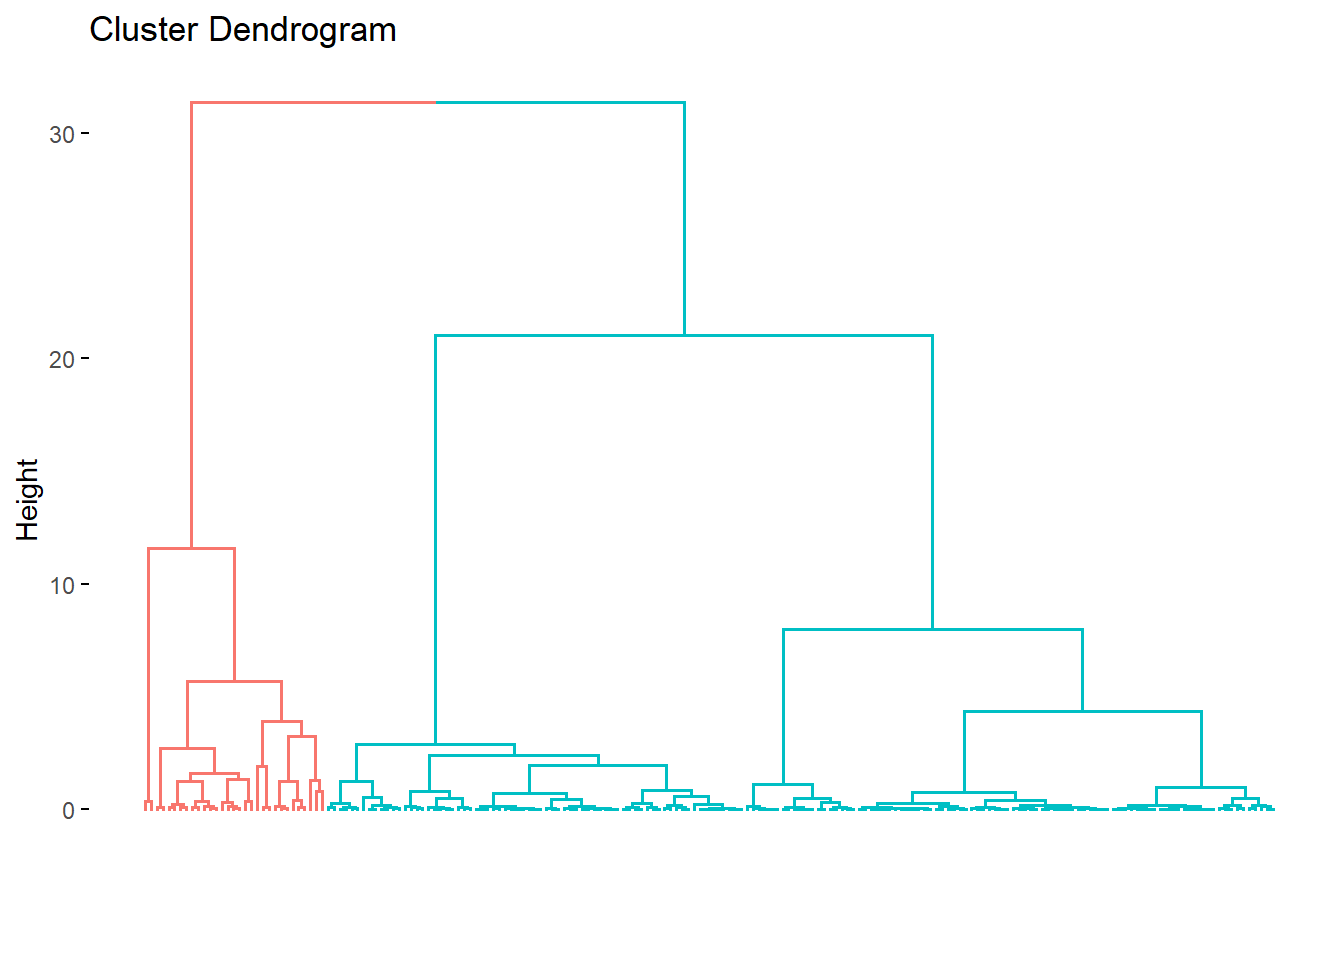 | PANEL (B)  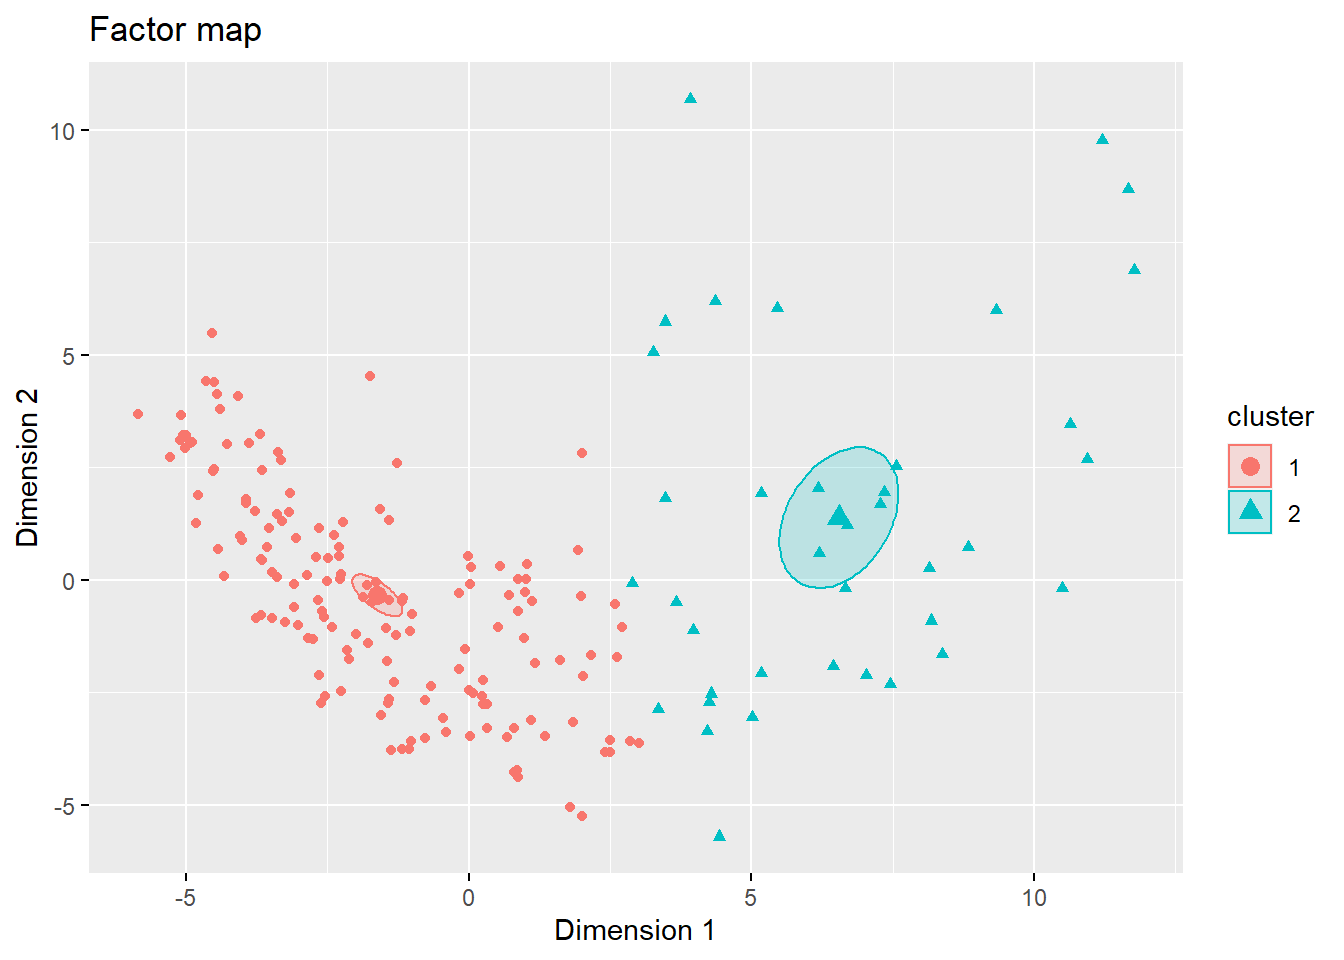 |
| --- | --- |

**Figure S2.** Cluster Analysis.

Cluster Dendrogram (Panel A). The height axis displays the distance (Euclidean) between observations and/or clusters. The horizontal bars indicate the point at which two clusters/observations are merged. The Ward clusters method has been considered with a Manhattan metric for distances

Factor Map (Panel B). Individual loadings are represented according to latent dimensions (Factors). The individual cluster membership is identified according to colors. The cluster centroids are represented together with the 96% confidence ellipses.
